# Supplementary material for: Enhanced activity of highly ordered pristine and black anodic TiO2nanotubes for high performance supercapacitors
Source: Royal Society of Chemistry journal article supplement (doi:10.1039/d4ma00199k), 2024-01-01
Supplement: d4ma00199k1.pdf [file d4ma00199k1.pdf]

## Supplementary document

### Enhanced activity of highly ordered pristine and black anodic TiO<sub>2</sub> nanotubes for high performance supercapacitors

*Farzad Nasirpouri\**, *Leila Jafari-Foruzin*, *Amirali Farmani*, *Elham Hosseinpour*, *Hassan Yadipour*

The CV data was used to calculate the specific capacitance values for various TNT based active material-coated electrodes using the following equation<sup>1</sup>:

$$C_s = \frac{\int I.dV}{A.s.\Delta V} \quad (1)$$

Where  $C_s$  is the areal capacitance (in F cm<sup>-2</sup>),  $s$  is the scan rate (in mV s<sup>-1</sup>),  $\Delta V$  is the potential window (in V) and the  $A$  is the surface area of the electrode exposed to the electrolyte. As was reported at Fig. S1(a), the areal capacitance of the black TNT (TNT-R) at a scan rate of 50 mV s<sup>-1</sup> was 0.78 mF cm<sup>-2</sup>, and it is significantly greater than that of TNT-1 h-30 min, TNT-4 h-30 min, and TNT-4 h-1h. The highest value of areal capacity obtained for TNT-R which is due to the decrease of the band gap energy owing to the microstructural defects such as oxygen vacancies<sup>2, 3</sup>. **Table S1** summarises the data obtained from cyclic voltammetry for calculated the areal capacitance. Also, the variation of areal capacitance of TNT-R as a function of potential scan rate is reported in **Fig.S1 (b)**. The areal capacitance of TNT-R decreases when the scan rate increases. The areal capacitance of TNT-R is decreased from 1.40 to 0.43 mF cm<sup>-2</sup> with increasing the scan rate from 2 to 100 mV s<sup>-1</sup>.<sup>4</sup>

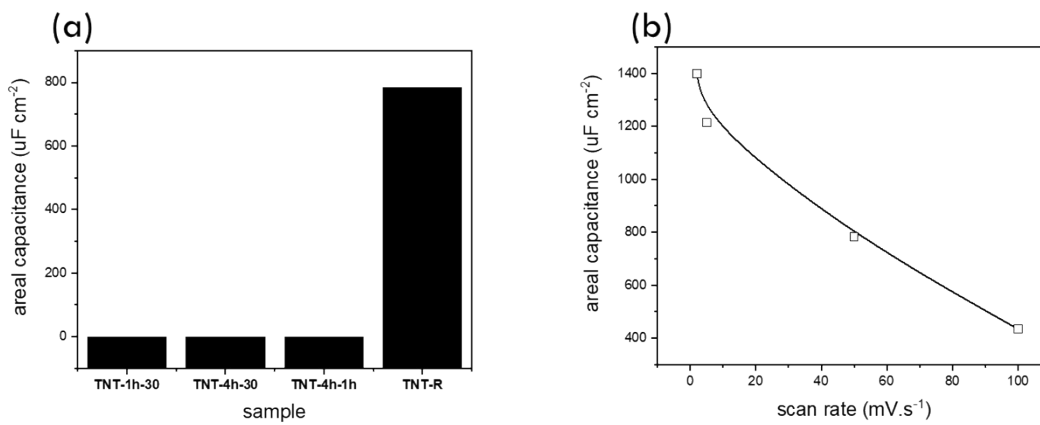

**Fig S (a)** the calculated capacitance for different electrodes at scan rate 50 mV s<sup>-1</sup> **and (b)** the areal capacitance of TNT-R at scan rate 2, 5, 50 and 100 mV s<sup>-1</sup>

**Table 1.** Areal capacity of different electrodes at scan rate 50 mV s<sup>-1</sup> (obtained from CV)

| Electrode      | Areal capacitance<br>(uF cm <sup>-2</sup> ) obtained<br>from CV |
|----------------|-----------------------------------------------------------------|
| TNT-1 h-30 min | 0.00285                                                         |
| TNT-4 h-30 min | 0.00181                                                         |
| TNT-4 h-1h     | 0.00355                                                         |
| TNT-R          | 783.76549                                                       |

1. M. Kumar, S. Polaki and S. Dhara, *Journal of Energy Storage*, 2024, **79**, 110160.
2. S. Kalathil, M. M. Khan, S. A. Ansari, J. Lee and M. H. Cho, *Nanoscale*, 2013, **5**, 6323-6326.
3. Q. Kang, J. Cao, Y. Zhang, L. Liu, H. Xu and J. Ye, *journal of materials chemistry A*, 2013, **1**, 5766-5774.
4. C. Zhang, S. Xu, D. Cai, J. Cao, L. Wang and W. Han, *Electrochimica Acta*, 2020, **330**, 135277.
